# Supplementary material for: Antigen phagocytosis by B cells is required for a potent humoral response
Source: PubMed Central journal article supplement (PMC6123646; doi:10.15252/embr.201846016), 2018-07-10
Supplement: EMBR-19-e46016-s001.pdf [file EMBR-19-e46016-s001.pdf]

## Expanded View Figures

### Figure EV1. Follicular B cells phagocytose particulate antigens *in vitro* through an actin- and RhoG-dependent mechanism.

- A Follicular B cells phagocytose particulate antigens *in vitro* through a RhoG-dependent mechanism. Flow cytometry plots of purified FO B cells incubated for 1 h at 0°C or 37°C with 1  $\mu$ m fluorescent beads coated with a goat anti-mouse anti-IgM antibody and stained afterwards extracellularly on ice with an anti-goat IgG 488. Gate shows the B cells with internalized beads (negative for the anti-goat IgG staining).
- B Flow cytometry plots of purified FO B cells incubated with 1 and 3  $\mu$ m Y/G fluorescent beads coated with anti-IgM for 2 h at 37°C. Cells were afterwards stained directly on ice with an anti-goat IgG 647 (plots on the left) or after fixation and permeabilization (plots on the right).
- C Flow cytometry plots of WT B cells non-treated or treated with Latrunculin A and incubated for 1 h with 1 and 3  $\mu$ m fluorescent beads coated with anti-IgM antibody. Subsequently, cells were stained extracellularly with anti-goat 488. Gates indicate those B cells with internalized beads. Bar plots on the bottom show the phagocytic index of *Rhog*<sup>-/-</sup> or WT B cells non-treated or treated with Cytochalasin D (1  $\mu$ g/ml), Latrunculin A (20  $\mu$ g/ml) or PP2 (20  $\mu$ M) after 1 h incubation at 0°C or at 37°C with 1 (left graph) or 3  $\mu$ m beads (right graph) coated with anti-IgM. Data represents means and SEM ( $n = 3$ ). \* $P < 0.05$ ; \*\* $P < 0.005$ ; (unpaired Student's  $t$  test).
- D Confocal microscopy images of WT and *Rhog*<sup>-/-</sup> B cells after 1 h incubation at 37°C with 3  $\mu$ m beads coated with anti-IgM. Stainings for IgM, F-actin and beads are shown in red, green and blue, respectively.

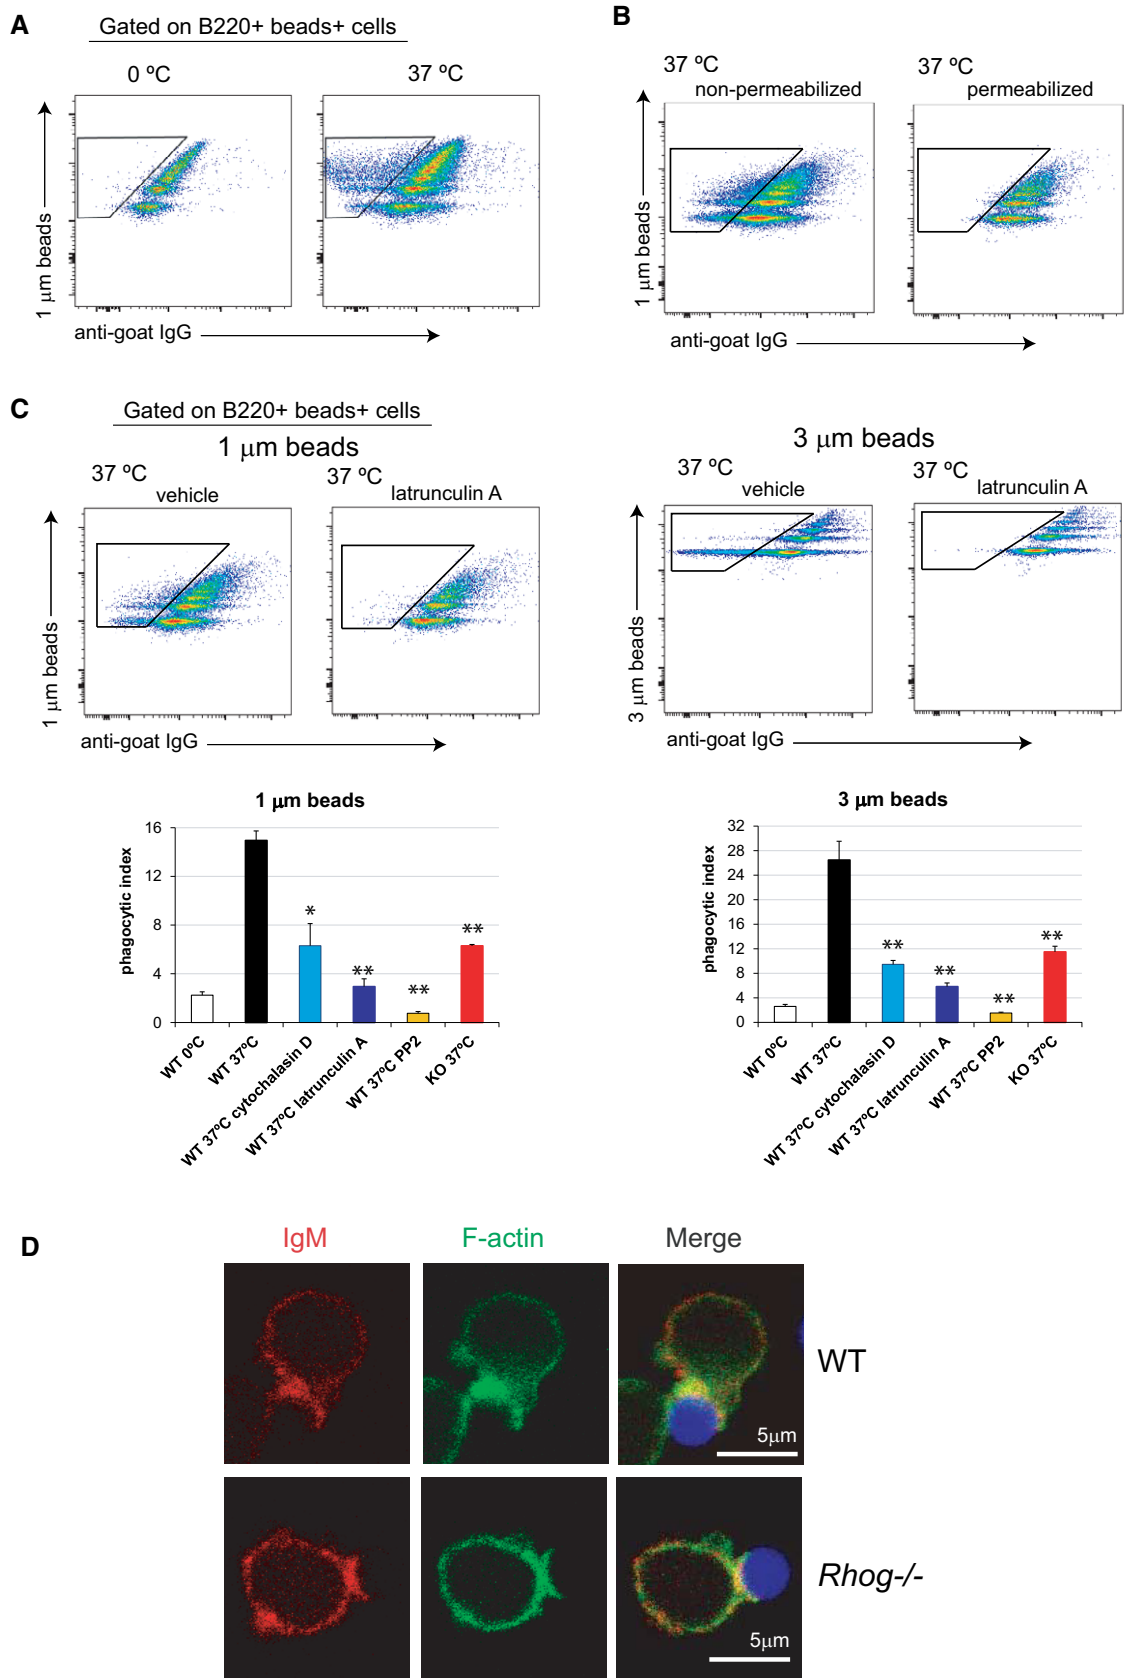

Figure EV1.

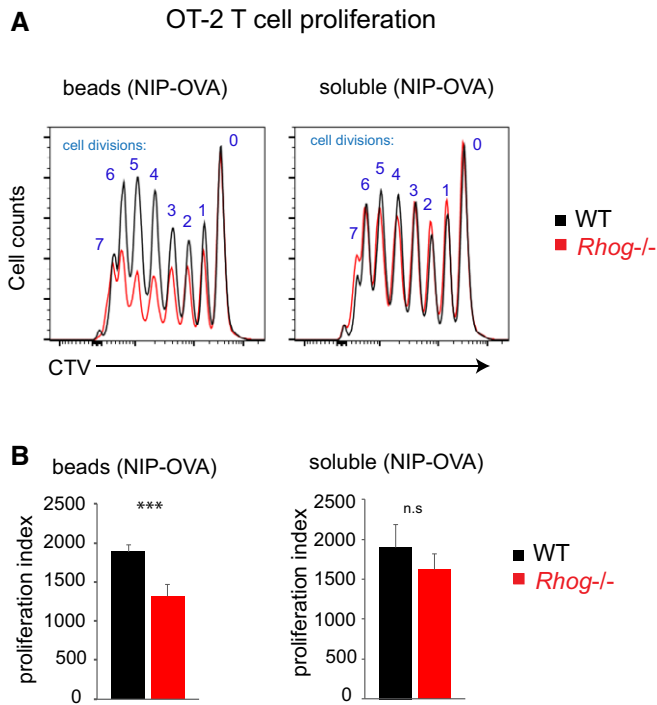

**Figure EV2. *Rhog*<sup>-/-</sup> B cells are defective in the acquisition and presentation of antigen to T cells when antigen is given bound to beads but not in soluble form.**

A Overlaid histograms showing Cell Trace Violet (CTV) dilution of OT CD4<sup>+</sup> T cells incubated for 4 days with B1-8<sup>hi</sup> B cells, WT or or *Rhog*<sup>-/-</sup>, previously incubated with either 1  $\mu$ m beads coated with NIP-OVA (3:1 ratio beads:B cell) or 100 ng/ml soluble NIP-OVA.

B Bar plots show quantitative data on OT2 T cell proliferation calculated according to the number of cell divisions, as shown in (A), or a proliferation index (Materials and Methods). Data represent means  $\pm$  SEM ( $n = 3$ ). n.s  $P > 0.05$ ; \*\*\* $P < 0.0005$  (unpaired Student's  $t$  test).

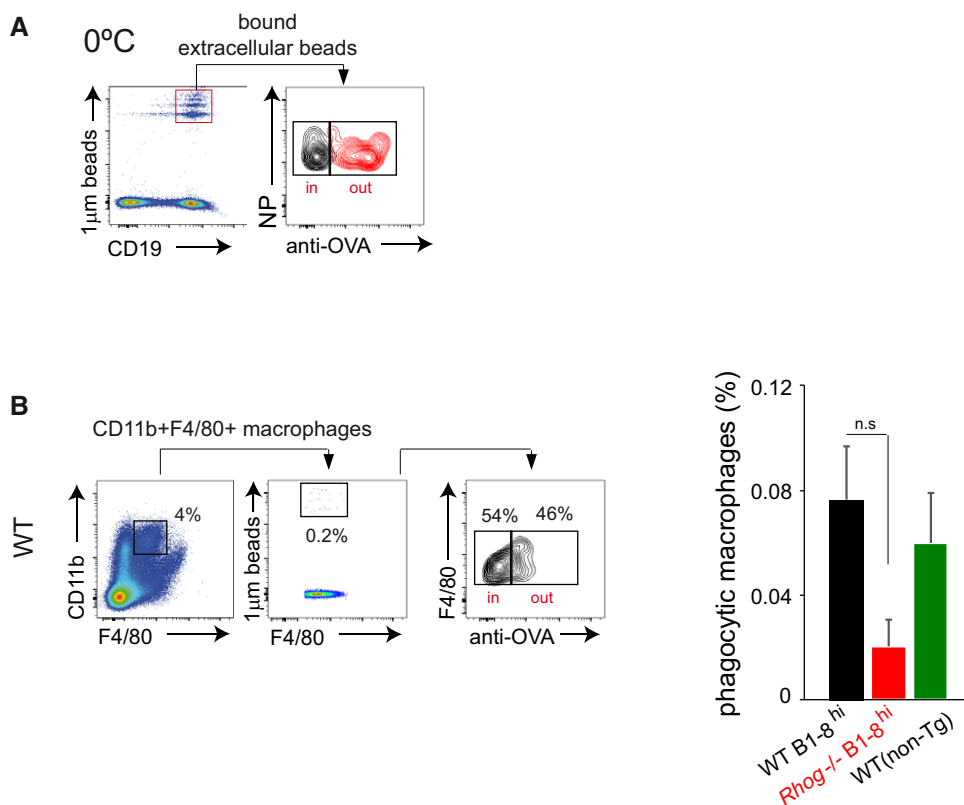

**Figure EV3. Antigen-specific splenic B cells phagocytose antigens *in vivo* through a BCR-driven process also dependent on RhoG.**

- A WT B1-8<sup>hi</sup> B cells were incubated *in vitro* with fluorescent 1 μm beads coated with NIP-OVA at 0°C for 1 h and subsequently left unstained or stained with an anti-OVA antibody. B cells with extracellular membrane-attached beads that are not internalized are positive for the fluorescent beads and the anti-ova staining (red histogram), while the control without primary antibody is in grey.
- B Phagocytosis of 1 μm fluorescent beads covalently bound to NIP-OVA by splenic macrophages from WT or *Rhog*<sup>-/-</sup> B1-8<sup>hi</sup> and WT non-transgenic mice was assessed after 5 h post-IP immunization using extracellular staining with an anti-ovalbumin antibody. The cytometry plot shows staining with the anti-OVA antibody in the CD11b<sup>+</sup> F4/80<sup>+</sup> macrophage population. The graph on the right shows the percentage of phagocytic splenic macrophages in WT and *Rhog*<sup>-/-</sup> mice. Data represents means and SEM (*n* = 3). n.s, not significant (unpaired Student's *t* test).

**Figure EV4. *Rhog*<sup>-/-</sup> B cells show normal proliferation and plasma cell differentiation upon TLR and BCR soluble stimulation but not to a particulate BCR-stimulation.**

- A *In vitro* plasma cell differentiation (CD138<sup>+</sup>) obtained after 3 days of stimulation of Cell Trace Violet-stained WT and *Rhog*<sup>-/-</sup> B cells with 1 μg/ml CpG or 1 μg/ml LPS in the presence of IL-4 and IL-5. Bar graphs show the means ± SEM of plasma cell (PC) percentages (CD138<sup>+</sup> IgD<sup>-</sup>) and the proliferation index (*n* = 3).
- B, C CTV-B cells from WT and *Rhog*<sup>-/-</sup> mice were stimulated for 3 days with anti-IgM (5 μg/ml) + CpG (1 μg/ml), soluble anti-IgM (3, 10, 30 μg/ml) (B), or bead-bound anti-IgM (4:1, 10:1, 15:1 ratio beads:B cell) in the presence of IL-4 and IL-5 (C). Histogram plots of CTV- B cells from WT and *Rhog*<sup>-/-</sup> mice after the different stimulations. Quantification charts show the proliferation index (*n* = 3). Data shows means ± SEM.

Data information: n.s *P* > 0.05; \**P* < 0.05; \*\**P* < 0.005 (unpaired Student's *t* test).

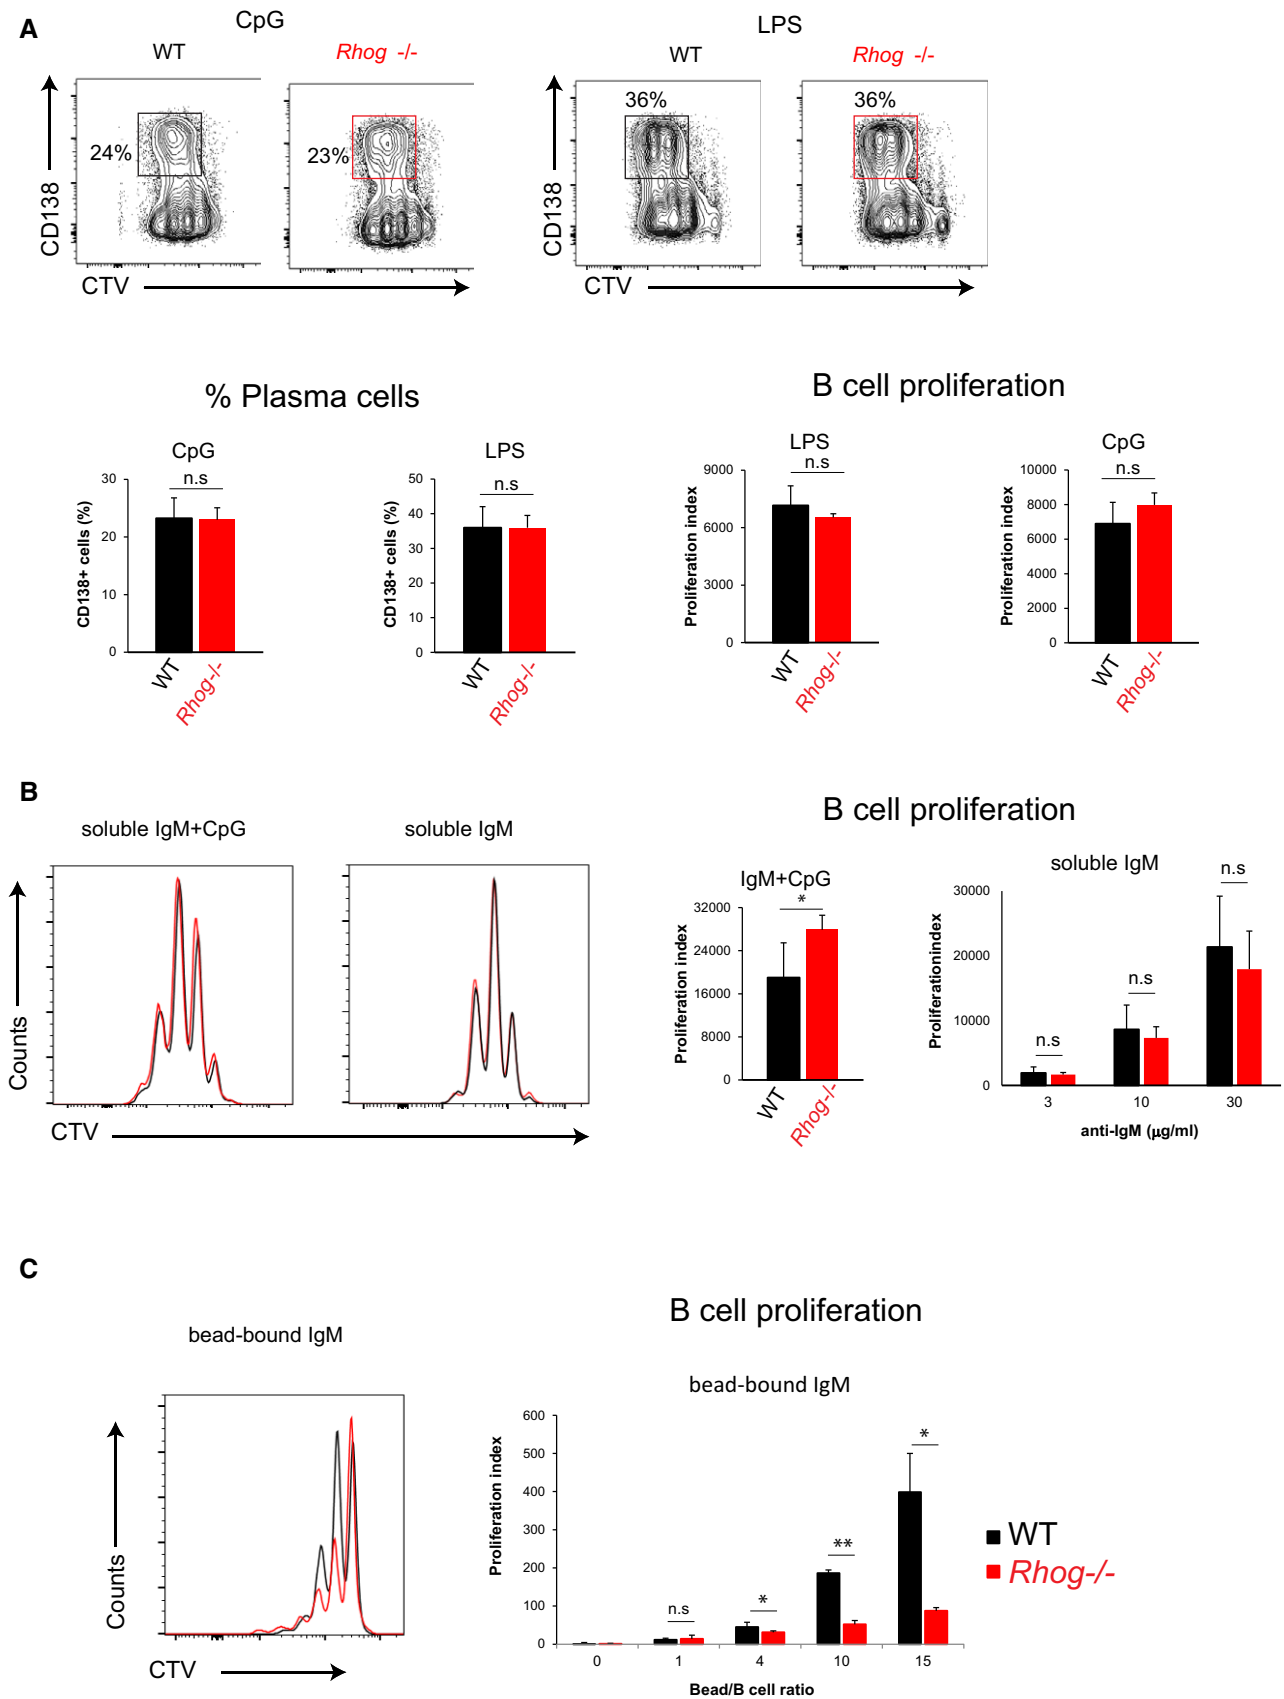

Figure EV4.
